# Supplementary material
Source: Springer Nature journal article supplement (https://www.springermedizin.de/resource/supplementary/12990_2007_93_MOESM1_ESM.pdf/9612552)

# Analgesia time-course

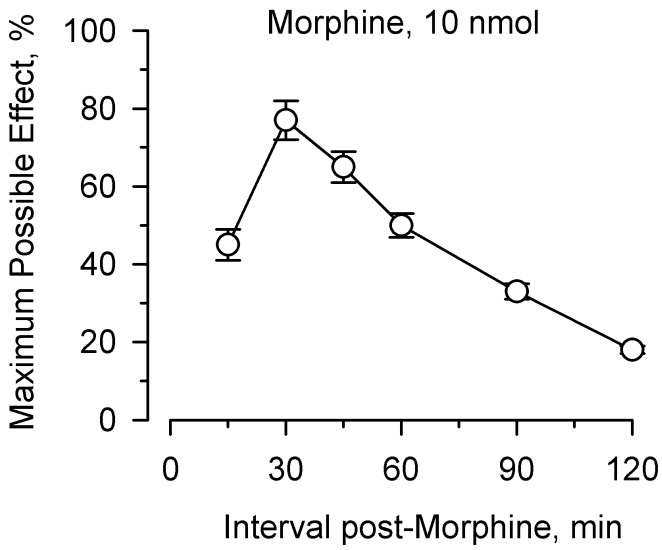

IP: MOR

Membrane

Internalized

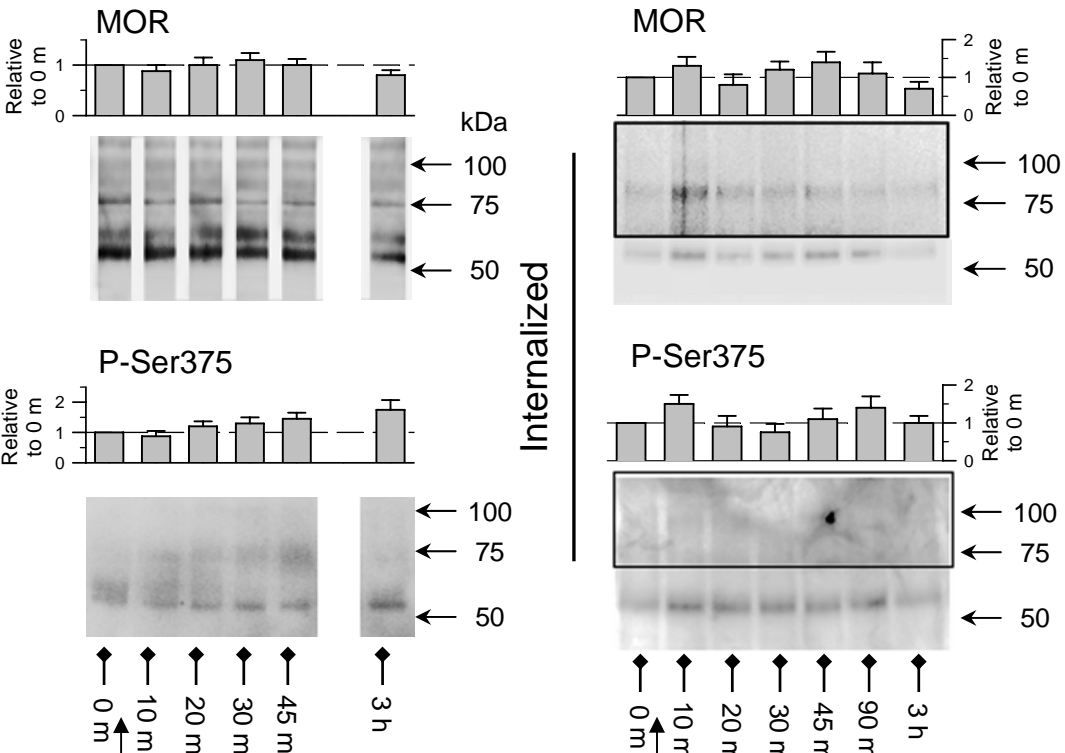

Morphine 10 nmol, 1<sup>st</sup> dose

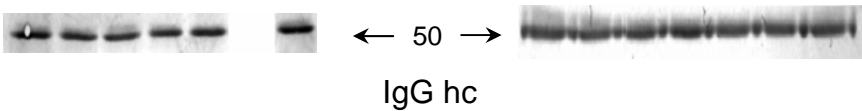

Supplement: MOESM1 [file 9612552]
